# Supplementary material for: Independent fermentation and metabolism of dietary polyphenols associated with a plant cell wall model
Source: Royal Society of Chemistry journal article supplement (doi:10.1039/c9fo02987g), 2020-01-01
Supplement: c9fo02987g1.pdf [file c9fo02987g1.pdf]

## Supplementary

**Table S1:** Chemical composition of ACW

| <b>Monosaccharide analysis</b>    | <b>Mol%</b>              |
|-----------------------------------|--------------------------|
| Fucose                            | 1.4 ± 0.1 <sup>(*)</sup> |
| Arabinose                         | 16.5 ± 0.4               |
| Xylose                            | 8.2 ± 2.4                |
| Mannose                           | 1.0 ± 0.4                |
| Galactose                         | 37.1 ± 1.1               |
| Glucose                           | 34.4 ± 2.3               |
| Rhamnose                          | 1.6 ± 0                  |
| <b><i>Total</i></b>               | <b>100</b>               |
| Uronic acid (%)                   | 31.5                     |
| Yield (g/100 g fresh apple flesh) | 1.0 ~ 1.5                |
| Starch (g/100 g ACW)              | 4.6                      |

*(\*) presents means and standard deviations (n = 2)*

Table S2. Monosaccharide linkage composition of ACW

| Derivative Linkage | % mol | Derivative Linkage | % mol |
|--------------------|-------|--------------------|-------|
| t-Ara (f)          | 5.6*  | 1,3,6-Glc (p)      | 0.5   |
| 1,2-Ara (f)        | 0.2   | 1,4,6-Glc (p)      | 5.7   |
| 1,3-Ara (f)        | 1.0   | 1,3,4,6-Glc (p)    | 0.5   |
| 1,5-Ara (f)        | 5.5   | 1,2,4,6-Glc (p)    | 0.2   |
| 1,3,5-Ara (f)      | 3.6   | t-Man (p)          | 0.1   |
| 1,2,5-Ara (f)      | 0.7   | 1,2,4-Man (p)      | 0.3   |
| t-Xyl (p)          | 3.3   | 1,4,6-Man (p)      | 0.1   |
| 1,2-Xyl (p)        | 2.7   | 1,2,3,4-Man (p)    | 0.4   |
| 1,4-Xyl (p)        | 0.9   | t-Gal (p)          | 2.6   |
| 1,3,4-Xyl (p)      | 0.4   | 1,4-Gal (p)        | 1.6   |
| 1,2,4-Xyl (p)      | 0.8   | 1,6-Gal (p)        | 0.2   |
| t-Rha (p)          | 0.1   | 1,3,4-Gal (p)      | 1.3   |
| 1,2,4-Rha (p)      | 1.4   | 1,2,4-Gal (p)      | 0.4   |
| t-Fuc (p)          | 1.3   | 1,3,6-Gal (p)      | 0.1   |
| 1,4-Fuc (p)        | 0.1   | 1,3,4,6-Gal (p)    | 0.3   |
| t-Glc (p)          | 0.7   | 1,2,4,6-Gal (p)    | 0.2   |
| 1,4-Glc (p)        | 25.9  | t-GlcA             | 0.1   |
| 1,6-Glc (p)        | 0.2   | t-GalA             | 0.9   |
| 1,3,4-Glc (p)      | 0.6   | 1,4-GalA           | 29.7  |

\* Data are means of two replications.

**Table S3:** Possible microbial metabolites identified in fermentation fluids during 72 h fermentation employing UHPLC-ESI-MS

| Possible metabolites                               | Detected<br>$\lambda$ (nm) | Retention<br>time<br>(min) | [M-H] <sup>-</sup> | Absorbance<br>$\lambda_{\max}$<br>(200–500nm) | Occurrence |
|----------------------------------------------------|----------------------------|----------------------------|--------------------|-----------------------------------------------|------------|
| <i>Parent compound: Ferulic acid</i>               |                            |                            |                    |                                               |            |
| Dihydroferulic acid                                | 280                        | 1.819                      | 195.0649           | 280                                           | 2 → 12 h   |
| 3-(3',4'-dihydroxyphenyl)-propionic acid           | 280                        | 1.082                      | 181.493            | 280                                           | 6 → 72 h   |
| Hydroxyphenylacetic acid                           | 280                        | 1.758                      | 151.0473           | 272                                           | 9 → 72 h   |
| <i>Parent compound: (+/-)-Catechin</i>             |                            |                            |                    |                                               |            |
| Cat-Met 1 (Not identification)                     | 280                        | 1.318                      | -                  | 280                                           | 4 → 24 h   |
| 5-(3',4'-dihydroxyphenyl) valeric acid             | 280                        | 1.908                      | 209.0808           | 273                                           | 4 → 72 h   |
| 5-(3',4'-dihydroxyphenyl)- $\gamma$ -valerolactone | 280                        | 2.232                      | 207.2120           | 272                                           | 9 → 72 h   |
| <i>Parent compound: Cyanidin-3-glucoside</i>       |                            |                            |                    |                                               |            |
| Protocatechuic acid                                | 280                        | 0.693                      | 153.179            | 260/293                                       | 4 → 72 h   |
| Hydroxybenzoic acid                                | 280                        | 1.035                      | 137.0229           | 279/309                                       | 4 → 72 h   |
| Caffeic acid                                       | 280                        | 1.335                      | 179.0335           | 287                                           | 4 → 72 h   |
| <b>[M-H]<sup>+</sup></b>                           |                            |                            |                    |                                               |            |
| Cyanidin                                           | 499                        | 1.669                      | 287.0563           | 295/490                                       | 6 → 48 h   |
| Pelargonidin                                       | 499                        | 2.008                      | 271.0614           | 279/313/485                                   | 4 → 72 h   |

(-) not determined
